1 **Investigations of the mechanisms of interactions**  
2 **between four non-conventional species with**  
3 ***Saccharomyces cerevisiae* in oenological**  
4 **conditions**

5  
6 Oliver Harlé<sup>1</sup>, Judith Legrand<sup>3</sup>, Catherine Tesnière<sup>2</sup>, Martine Pradal<sup>2</sup>, Jean-Roch Mouret<sup>2</sup>,  
7 Thibault Nidelet<sup>2\*</sup>

8  
9 Affiliations :

10 1 : STLO, INRA, Agrocampus Ouest, Rennes, France

11 2 : SPO, Univ. Montpellier, INRA, Montpellier SupAgro, Montpellier, France

12 3 : GQE-Le Moulon, INRA, Univ. Paris-Sud, CNRS, AgroParisTech, Université Paris-Saclay,  
13 Gif-sur-Yvette, France

14 \* **Corresponding Author:** thibault.nidelet@inra.fr

15  
16 **keywords:** winemaking fermentation, population dynamics, non-*Saccharomyces* species,  
17 interactions, ecosystems

18  
19  
20 **Abstract**

21 Fermentation by microorganisms is a key step in the production of traditional food  
22 products such as bread, cheese, beer and wine. In these fermentative ecosystems,  
23 microorganisms interact in various ways, namely competition, predation, commensalism and  
24 mutualism. Traditional wine fermentation is a complex microbial process performed by  
25 *Saccharomyces* and non-*Saccharomyces* (NS) yeast species. To better understand the different  
26 interactions occurring within wine fermentation, isolated yeast cultures were compared with  
27 mixed co-cultures of one reference strain of *S. cerevisiae* with one strain of four NS yeast  
28 species (*Metschnikowia pulcherrima*, *M. fructicola*, *Hanseniaspora opuntiae* and *H. uvarum*).  
29 In each case, we studied population dynamics, resource consumed and metabolites produced  
30 from central carbon metabolism. This phenotyping of competition kinetics allowed us to  
31 confirm the main mechanisms of interaction between strains of four NS species. *S. cerevisiae*  
32 competed with *H. uvarum* and *H. opuntiae* for resources although both *Hanseniaspora* species  
33 were characterized by a strong mortality either in isolated or mixed fermentations. *M.*  
34 *pulcherrima* and *M. fructicola* displayed a negative interaction with the *S. cerevisiae* strain  
35 tested, with a decrease in viability in co-culture, probably due to iron depletion via the  
36 production of pulcherriminic acid. Overall, this work highlights the importance of measuring  
37 specific cell populations in mixed cultures and their metabolite kinetics to understand yeast-  
38 yeast interactions. These results are a first step towards ecological engineering and the rational  
39 design of optimal multi-species starter consortia using modeling tools. In particular the  
40 originality of this paper is for the first times to highlight the joint-effect of different species  
41 population dynamics on glycerol production and also to discuss on the putative role of lipid  
42 uptake on the limitation of some non-conventional species growth although interaction  
43 processes.

44

45

## 46 1. Introduction

47 In natural or anthropized environments, microbial species are part of an ecosystem and  
48 interact positively or negatively, forming a complex network. Until recently, process  
49 optimization in agriculture or food processing was mostly based on the selection of single  
50 strains. However, this paradigm is now being challenged and the scientific community is  
51 increasingly seeking to exploit and optimize consortia of several strains and/or species. Indeed,  
52 many studies have shown that more diverse anthropized environments have many advantages  
53 in terms of resilience, disease resistance or yield . Efforts are now being made to design optimal  
54 consortia of various species and strains whose interactions will be exploited to maximize given  
55 criteria such as fermentation quality, aromatic complexity or other organoleptic characteristics.

56  
57 Wine fermentation is both an economically and societally important food ecosystem,  
58 where the addition of fermentation ‘starters’ composed of selected yeasts at the beginning of  
59 the fermentation process is common. In fact, around 80% of oenological fermentations  
60 worldwide are conducted with starters (1,2). Most often, these “starters” are only composed of  
61 a single *Saccharomyces cerevisiae* (S. c.) strain selected for its ability to complete fermentation.  
62 Indeed, numerous experiments have shown that *S. cerevisiae*, with an initially low population,  
63 most often becomes the predominant species at the end of the fermentation, demonstrating its  
64 superior fermentative abilities (3–6). However, in recent years, multi-species starters have  
65 emerged, aiming at increasing the aromatic complexity of wines. They most often combine one  
66 strain of *S. cerevisiae* allowing to complete fermentation and another species, often from a  
67 different genus, contributing to a greater variety of flavors (3,4,6,7).

68 Indeed, there are numerous experiments and even industrial products making use of such  
69 mixed starters to improve wine’s organoleptic qualities (4,8,9). The non-*Saccharomyces* (NS)  
70 strains used in these experiments are very diverse, with more than 23 different species including

71 *Torulaspora delbrueckii*, *Metschnikowia pulcherrima*, *Metschnikowia fructicola*,  
72 *Hanseniaspora opuntiae* and *Hanseniaspora uvarum*. Species in the *Metschnikowia* genus  
73 ferment poorly in oenological conditions but can have interesting attributes: in conjunction with  
74 *S. cerevisiae*, a strain of *M. pulcherrima* could reduce ethanol concentrations (6,10), increase  
75 ‘citrus/grape fruit’ and ‘pear’ attributes (11), as well as allow the persistence of ‘smocky’ and  
76 ‘flowery’ characteristics (12). *M. pulcherrima* also has an amensalism effect on *S. cerevisiae*  
77 through iron depletion via the production of pulcherriminic acid (13). *M. fructicola* has been  
78 less studied and never in conjunction with *S. cerevisiae* although it presents the interesting  
79 ability to inhibit *Botrytis* growth (14). Last, the *Hanseniaspora* genus, studied in sequential or  
80 simultaneous fermentation with *S. cerevisiae*, has been shown to increase volatile compound  
81 production during winemaking (6). It notably increased the ‘tropical fruit’, ‘berry’, ‘floral’ and  
82 ‘nut aroma’ characters (15), that were linked to higher concentrations of acetate esters, esters  
83 of MCFAs, isoamyl alcohol, 2-phenylethanol and  $\alpha$ -terpineol (16).

84         Despite these various studies, the composition and protocol of inoculation of these multi-  
85 strains starters are still very empirical and only based on the input/output balance, without  
86 considering the dynamics of the microbial populations or their interactions. This lack of  
87 knowledge about yeast-yeast interactions prevents implementing a rational design of multi-  
88 strain starters (17). To address this problem, we decided to focus our study on population  
89 dynamics and metabolites produced during oenological fermentations performed in isolated or  
90 mixed yeast cultures. Since our goal was not to obtain optimal mixes but to understand the  
91 mechanism of microbial interaction, we chose to compare the population dynamics and yields  
92 between isolated cultures of strains from five species (one *S. cerevisiae* and four NS) and four  
93 corresponding mixed cultures always including the *S. cerevisiae* strain as reference. We were  
94 thus able to identify key microbial interaction mechanisms that are further discussed.

95

## 96 2. Results

97 In this work, we compared in winemaking conditions the performance of single cell  
98 cultures of five different strains from five yeast species (*Saccharomyces cerevisiae*,  
99 *Metschnikowia pulcherrima*, *Metschnikowia fructicola*, *Hanseniaspora opuntiae* and  
100 *Hanseniaspora uvarum*) and mixed co-cultures combining each of the four NS species with  
101 one GFP-labelled *S. cerevisiae* strain representing 10% of the initial inoculate. We choose to  
102 stop the monitoring of fermentation at a given time, even if the sugar supply was not completely  
103 exhausted. Thus, for all fermentation with the *S. cerevisiae* reference strain, sugars were  
104 exhausted after around 200-220 h while in fermentations with single NS strains, the sugar  
105 supply was still not exhausted after 400h. Here, we focused on the first 300 hours of  
106 fermentation.

107 By comparing the output of single strain and mixed strain cultures, we evaluated the  
108 intensity of yeast-yeast interactions and/or their consequences on ecosystem service production.

109

### 110 2.1. CO<sub>2</sub> kinetics

111 We first investigated the influence of species and co-culture on the dynamics of CO<sub>2</sub>  
112 production (proportional to sugar consumption), which is a good indicator of the fermentation  
113 progress. Indeed, CO<sub>2</sub> production is easy to monitor (based on weight measurement) and is  
114 directly proportional to ethanol synthesis and sugar consumption. The values of the maximum  
115 rate of CO<sub>2</sub> production ( $V_{max}$ , Fig 1a) and of the maximum CO<sub>2</sub> produced were estimated  
116 ( $CO_{2max}$ , Fig 1b).  $V_{max}$  was highly dependent on the species (p.value < 0.001): *S. cerevisiae*  
117 cultures ( $Sc$ ) displayed the highest value ( $V_{max_{Sc}} = 0.99 \pm 0.02 \text{ g.L}^{-1}.\text{h}^{-1}$ ), followed by both  
118 *Hanseniaspora* species ( $V_{max_{Hu}} = 0.33 \pm 0.04 \text{ g.L}^{-1}.\text{h}^{-1}$ , and  $V_{max_{Ho}} = 0.42 \pm 0.02 \text{ g.L}^{-1}.\text{h}^{-1}$ )  
119 and finally both *Metschnikowia* species ( $V_{max_{Mp}} = 0.165 \pm 0.02 \text{ g.L}^{-1}.\text{h}^{-1}$  and  $V_{max_{Mf}} = 0.17 \pm$   
120  $0.04 \text{ g.L}^{-1}.\text{h}^{-1}$ ). The four mixed cultures had intermediate  $V_{max}$  values between those of  $Sc$  and

121 the highest  $V_{max}$  of all *non-sacc* cultures (Fig 1a). Mixed cultures containing *Metschnikowia*  
122 species had significantly higher  $V_{max}$  values than those containing *Hanseniaspora* species (Fig  
123 1a). Although we did not monitor all cultures until the exhaustion of glucose and fructose, it  
124 was however possible to estimate the capacity of a given species to complete fermentation by  
125 estimating the amount of  $CO_2$  produced during the first 300 hours. *Sc* fermentations finished  
126 after around 220 hours with a  $CO_{2max_{sc}} = 88.2 \pm 2.2$  g.L<sup>-1</sup>. We therefore can make the  
127 hypothesis that all cultures that produced more than 80g CO<sub>2</sub>.L<sup>-1</sup> (90% of *Sc* maximum) within  
128 300 hours will be able to complete fermentation. Under this assumption, all mixed cultures, but  
129 no NS single strain cultures, would eventually complete fermentation. Among the latter  
130 cultures, both *Hanseniaspora* species had the highest  $CO_{2max}$  (*Hu*  $30 \pm 0.4$  g.L<sup>-1</sup>, and *Ho*  $46$   
131  $\pm 0.6$  g.L<sup>-1</sup>) followed by *Metschnikowia* species (*Mp*  $22 \pm 0.4$  g.L<sup>-1</sup> and *Mf*  $20 \pm 1$  g.L<sup>-1</sup>).

132

### 133 FIG 1

134 **Maximum rate of CO<sub>2</sub> production,  $V_{max}$  (A) and total CO<sub>2</sub> produced (B) in function of**  
135 **the single or mixed strain species driving each fermentation.** Values corresponds to average  
136  $\pm$  standard deviation. The small letters indicate the statistical groups from a Tukey analysis.

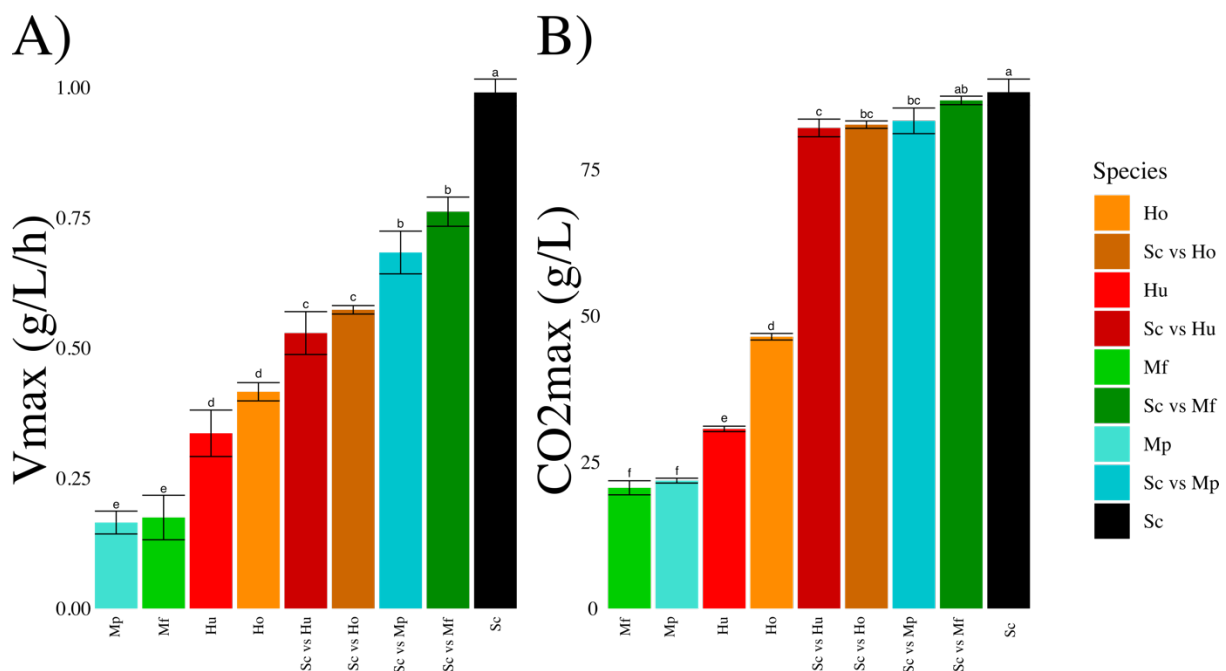

137

138

## 139 2.2. Population Kinetics

140 We also looked at population dynamics in each culture (Fig 2) and determined the  
141 maximum growth rate of the population ( $\mu$ ), the maximum population size, also termed carrying  
142 capacity ( $K$ ) and the relative abundance (by cytometry) of each species after 300 hours of mixed  
143 culture, corresponding in our case to the end of the monitoring period (S1 Table). Fermentations  
144 with *S. cerevisiae* alone went through an exponential growth rate ( $\mu_{Sc} = 0.15 \pm 0.02 \text{ h}^{-1}$ ) and  
145 reached a maximum population of around  $1.5 \cdot 10^8 \text{ cells.mL}^{-1}$  ( $K_{Sc} = 1.55 \pm 0.15 \cdot 10^8 \text{ cells.mL}^{-1}$ )  
146 that remained constant until the end of the fermentation. Fermentations with either  
147 *Hanseniaspora* species alone had a growth dynamic like *Sc* at the beginning of the fermentation  
148 but a higher growth rate ( $\mu_{Ho} = 0.19 \pm 0.03 \text{ h}^{-1}$ ,  $\mu_{Hu} = 0.62 \pm 0.18 \text{ h}^{-1}$ ). On the opposite, their  
149 stationary phase was quite different from that of *Sc* and characterized by a higher cell mortality  
150 with a population drop of about 70% by the end of the process. Fermentations performed by  
151 *Metschnikowia* species in single strain culture had growth dynamics mostly similar to *Sc*  
152 fermentations: a similar growth rate ( $\mu_{mp} = 0.18 \pm 0.03 \text{ h}^{-1}$ ,  $\mu_{Mf} = 0.17 \pm 0.2 \text{ h}^{-1}$ ), no mortality  
153 during the stationary phase but a much reduced maximum population ( $K_{Mp} = 0.57 \pm 0.01$   
154  $10^6 \text{ cells.mL}^{-1}$ ,  $K_{Mf} = 0.8 \pm 0.05 \cdot 10^6 \text{ cells.mL}^{-1}$ ). In most cases, mixed cultures displayed an  
155 intermediate pattern between the two corresponding single strain cultures (Fig 2). However,  
156 mixed or single strain cultures with *Metschnikowia* displayed different cell mortality rates  
157 during the stationary phase: in the case of *ScvsMp* fermentations, only the *S. cerevisiae*  
158 population decreased significantly during the stationary phase, while in *ScvsMf* fermentations,  
159 both subpopulations significantly decreased. As a measure of fitness, we also followed the  
160 variations of *S. cerevisiae* frequency along the fermentation. In all mixed cultures, *S. cerevisiae*  
161 was found dominant (frequency > 50%) in the end, increasing significantly during fermentation  
162 from 10% initially to frequencies varying between 50% (*ScvsMp*) and 96% (*ScvsMf*) (Fig 2).

163

164 **FIG 2**

165 **Global monitoring of the kinetics of the total living population (left), and sub-population**  
166 **in the mixed cultures (right) across fermentation.** Each population was detected by flow  
167 cytometry as indicated in the Material and Methods section. Each point represents a sample  
168 (average  $\pm$  standard error). Full lines are for total population and dashed lines for the two sub  
169 populations in mixed cultures. At the end of dashed lines, the final proportion of both sub-  
170 populations in mixed cultures is indicated. The light colors represent single straind cultures of  
171 ‘non-*Saccharomyces*’ strains and dark ones to the corresponding culture in competition with  
172 *S. cerevisiae*. The single strand cultures of *S. cerevisiae* are represented in black.



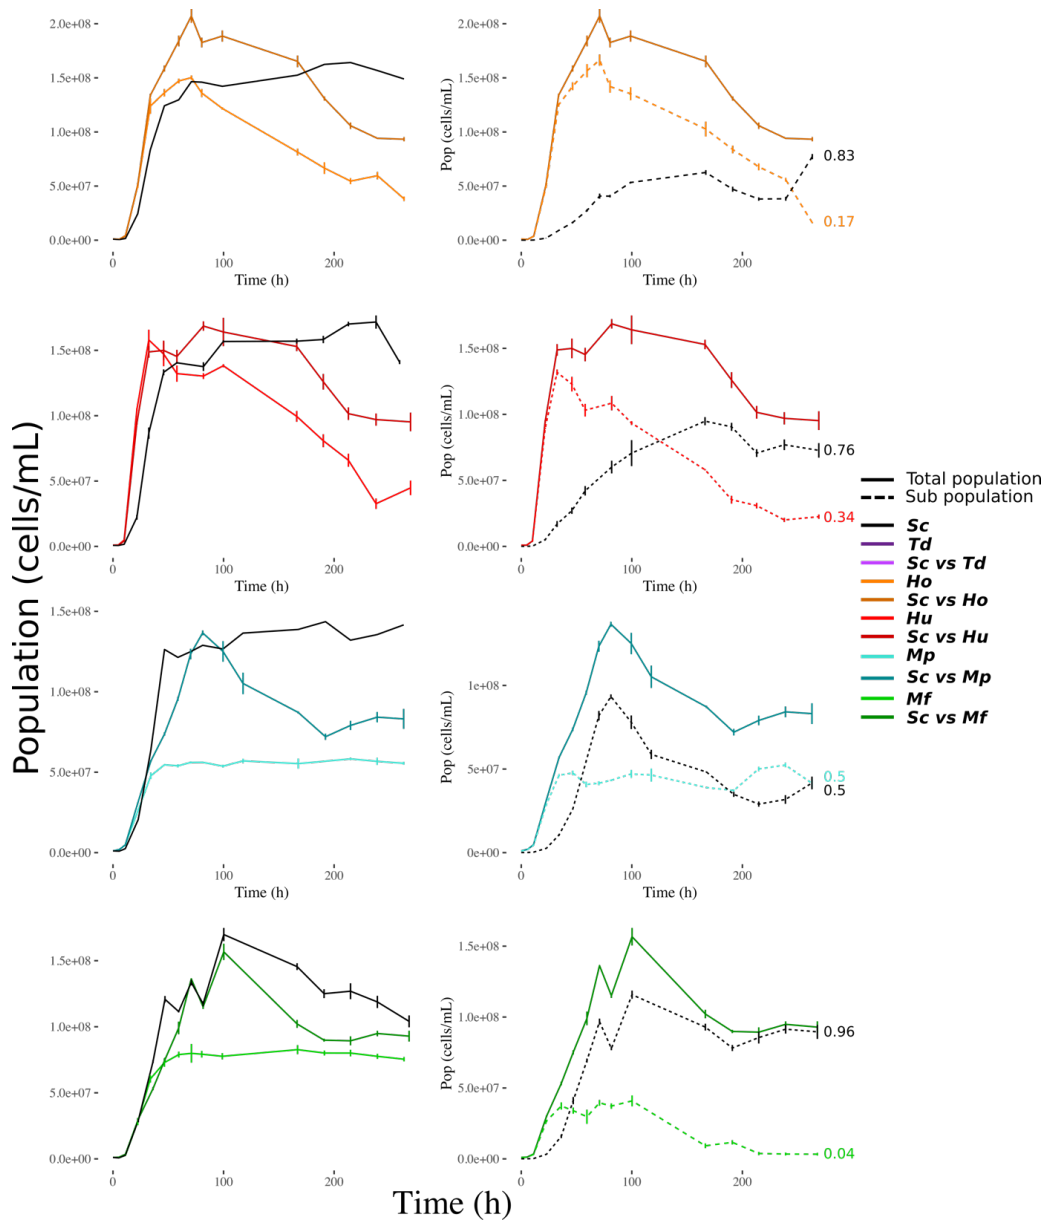

173

174

175

### 2.3. Sugar and nitrogen assimilable source consumption

176

177

178

179

180

181

We then looked at the final concentration of resources: sugars (fructose and glucose) and nitrogen assimilable source (NAS) i.e. ammonium and amino-acids (Fig 3). In *Sc* fermentations, less than 0.1% of the initial concentration of both sugars remained (Fig 3a). As seen in the paragraph concerning CO<sub>2</sub> production, NS species in single strain cultures did not complete fermentation in the 300h period and left respectively 45% of sugars for *Ho*, 67% for *Hu*, 68% for *Mf* and 71% for *Mp*. Furthermore, all species except *H. opuntiae* preferentially

182 consumed glucose (S1 Fig). Sugar consumption was higher in mixed cultures than in single NS  
183 species cultures (Fig 3a). However, it was still lower than in *Sc* species cultures, also with a  
184 preference for glucose. This indicates the major impact of *S. cerevisiae* on sugar consumption  
185 (consistent with the CO<sub>2</sub> production observed), compared to the other NS species studied.

186 The consumption of NAS displayed the same pattern (Fig 3b). NAS were almost entirely  
187 consumed both in *Sc* single strain cultures and in all co-cultures, whereas in NS single strain  
188 cultures the fraction of NAS consumed varied between 84% and 94%. However, the preference  
189 for different nitrogen sources varied with each NS species (Fig 3c). Both *Hanseniaspora*  
190 species had similar behaviors, consuming only half of the available ammonium, 90% of  
191 histidine and 89% or 79% of arginine (Fig 3c). *Metschnikowia* species presented a similar  
192 pattern. It was possible to classify these NS species preferences for the various NAS. The  
193 resulting ranking by order of preference was glutamine, methionine, glutamate, valine,  
194 threonine, serine, tryptophan, alanine, histidine, arginine, aspartate, glycine and, surprisingly  
195 last, ammonium.

196

### 197 **FIG3**

198 **Consumption of sugars and nitrogen assimilable sources (NAS) for each type of**  
199 **fermentation.** A) Final concentration of sugar (average  $\pm$  standard deviation). B) Final  
200 concentration of NAS (average  $\pm$  standard deviation). C) Percentage of consumption of each  
201 NAS in each type of fermentation represented as a color gradient from green (<75 %) to red (>  
202 75%).

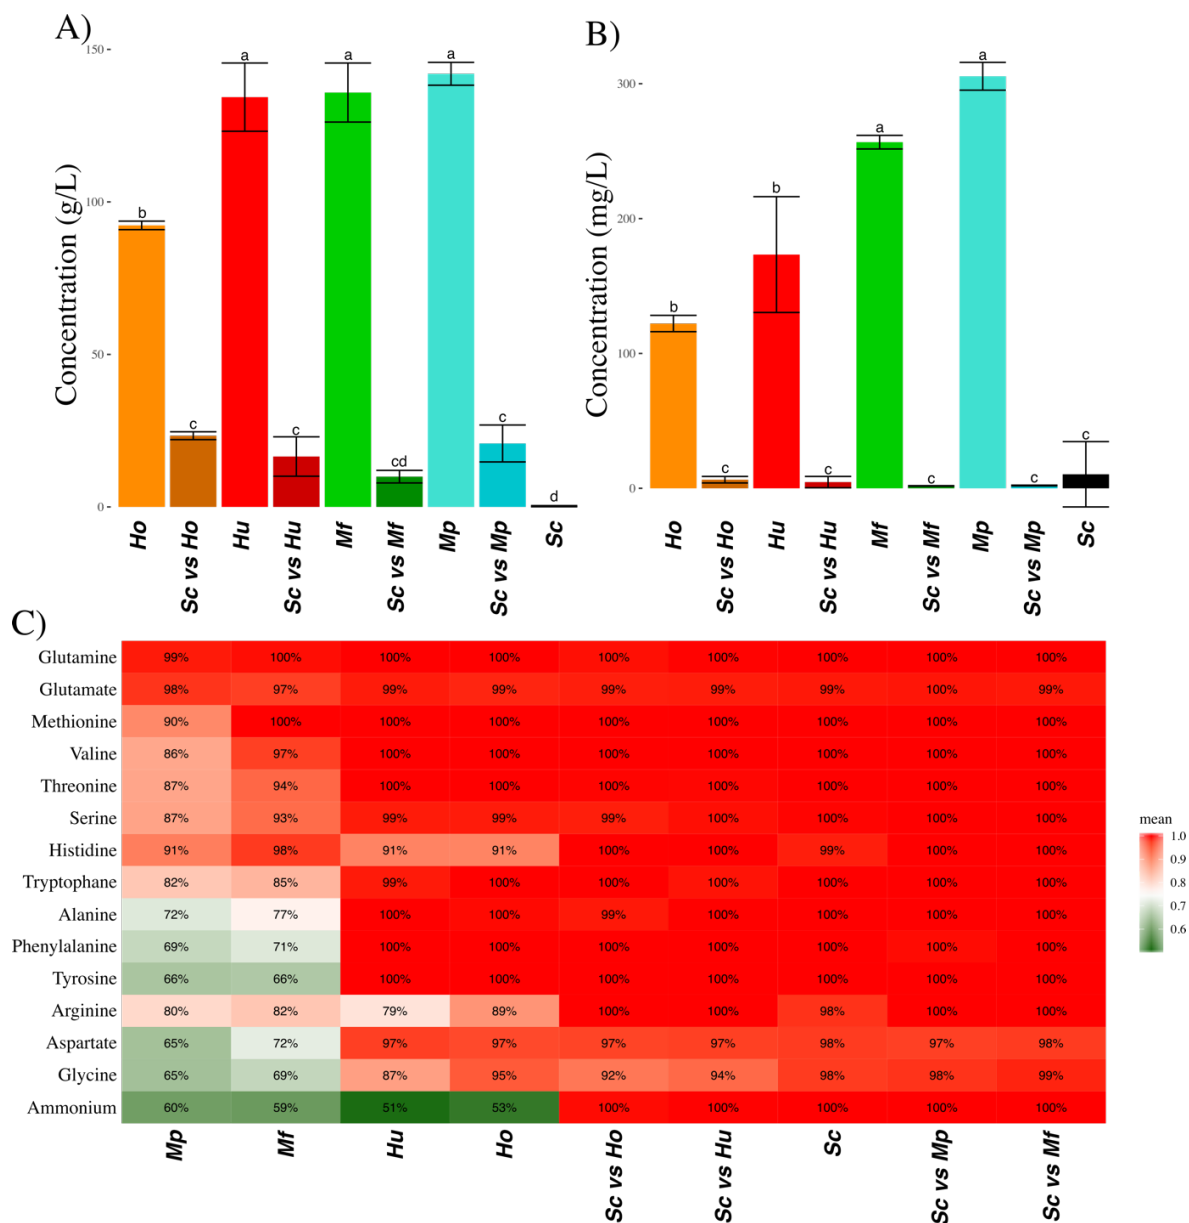

203

204

## 205 2.4. Metabolite production

206 In parallel with must resources consumption monitoring, we also investigated the  
 207 production of metabolites from Central Carbon Metabolism (CCM): ethanol, glycerol,  
 208 succinate, pyruvate, acetate and alpha-ketoglutarate (Fig 4). These measurements of metabolite  
 209 production were taken after 300 hours when sugars consumptions were quite different from one  
 210 culture to another depending on their dynamics. To allow figures comparison, we computed the

211 production yield (total production / sugar consumption) for each culture and, from these data,  
 212 we then estimated this yield relatively to that of *Sc* in single strain culture (Fig 4).

213

214 **FIG 4**

215 **Yield of carbon metabolite production relative to the yield of production of single**

216 *S. cerevisiae*. Average Yield are given with standard deviations for acetate, alpha-ketoglutarate,

217 ethanol, glycerol, pyruvate and succinate and each type of fermentation.

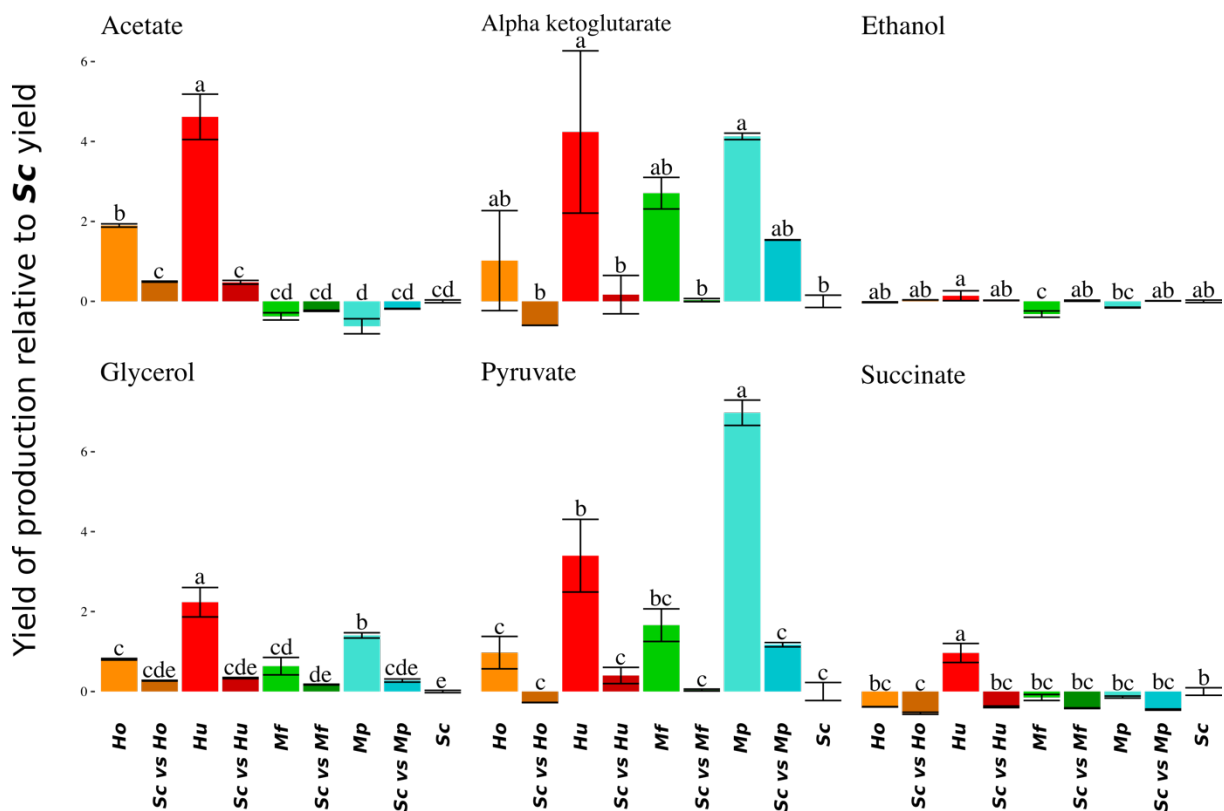

218

219

220 In the case of ethanol, only *Mf* fermentations had a relative yield significantly inferior (-

221 32%) to 0 (0 being *Sc* yield). For glycerol, all isolated NS fermentations had a greater yield

222 than *Sc* and mixed fermentations were intermediate between (but not significantly different

223 from) the corresponding single strain cultures. For acetate, only *Hanseniaspora* strains

224 displayed a higher yield (Fig 4).

225 Finally, all mixed cultures seemed to have a lower succinate yield than both  
226 corresponding isolated cultures (but not significantly after correction for multiple tests).

227  
228 For each fermentation, the total production of metabolites resulted from the combination  
229 of species yields, total sugar consumption and respective population dynamics during  
230 fermentation. Therefore, differences observed in the total productions of mixed cultures were  
231 the consequences of additive or subtractive effects observed for these 3 components.  
232 Considering ethanol, its total production was directly linked to the consumption of resources  
233 and all mixed cultures were equivalent to *Sc* fermentations (S2 Fig). The case of glycerol was  
234 more interesting. Indeed, even if the average sugar consumption was lower in *ScvsHu* and  
235 *ScvsMp* mixed cultures than in single strain *Sc* culture, the total production of glycerol was  
236 significantly higher than that of the corresponding single strain cultures ( $\text{Glycerol}_{ScvsMp} =$   
237  $6.1 \pm 0.1 \text{ g.L}^{-1}$ ,  $\text{Glycerol}_{Sc} = 5.3 \pm 0.4 \text{ g.L}^{-1}$ ,  $\text{Glycerol}_{Mp} = 3.7 \pm 0.2 \text{ g.L}^{-1}$ ). This resulted from the  
238 positive combination of the greater glycerol yield by *Hanseniaspora* and *Metschnikowia* and  
239 their population dynamics. For all other metabolites, the total production of mixed cultures was  
240 not significantly different from the corresponding single strain cultures (S1 Table).

241

242

### 243 3. Discussion

244 This study presents one of the first works focusing on the population dynamics and  
245 kinetics of yeast-yeast interactions between two species (S.C. and NS) during the alcoholic  
246 fermentative process (18), but dynamics are distinct according to the *M. pulcherrima* and *H.*  
247 *uvarum* strains tested in this study. Firstly, all strains grew in single strain and mixed strain  
248 cultures. *Metschnikowia* single strain cultures present lower  $V_{max}$  values than *Hanseniaspora*

249 single strain cultures, while mixed cultures containing *Metschnikowia* species had significantly  
250 higher  $V_{max}$  values than those containing *Hanseniaspora* species. It appears that the better  
251 growth behavior of *Hanseniaspora* strains limited more *S. cerevisiae*'s growth than  
252 *Metschnikowia* in mixed culture. The growth characteristics of the competing strains directly  
253 impact the mixed fermentation characteristics.

254 Mixed population dynamics were characterized by similar growth rate (reaching a  
255 maximum population like *S. cerevisiae* single strain culture), followed by a long phase with  
256 decreasing mortality. NS viability dropped to 30% in accordance with Moreira et al., 2008 and  
257 Tristezza et al., 2016. Their NAS consumption was also similar, with half of the available  
258 ammonium not being consumed. Even their yield and total production of CCM metabolites  
259 were very similar. For almost all these characteristics, mixed cultures presented intermediate  
260 phenotypes compared to the corresponding single strain cultures.

261 However, there is a remarkable exception considering the total production of glycerol  
262 that is superior in mixed cultures whereas their sugar consumption was inferior (Figure 4). This  
263 point is characteristic of a transgressive interaction (often referred to as over-yielding), i.e. a  
264 situation in which the ecosystem performance is higher than that of the best-yielding species  
265 present (when cultivated alone). This glycerol overproduction in mixed cultures has already  
266 been observed in previous works (16,19) but is not systematic depending on the strains and  
267 experimental conditions (20). In the present study, the glycerol and sugar consumption  
268 observed in mixed cultures is for the first time explained by the joint effect of population  
269 dynamics (*S. cerevisiae* slowly dominating the population), resource consumptions (the NS  
270 fermentation leaving  $\frac{2}{3}$  of sugars) and the glycerol yields of NS strains that were two to three  
271 times higher than that of *S. cerevisiae*.

272 These overproductions of glycerol open the way for potentially more interesting results.  
273 Our results point out that inoculation conditions in mixed cultures must be considered according

274 to fermentation aims and strains characteristics. Exploiting this specific yield and population  
275 dynamics, for example by inoculating the *S. cerevisiae* strain at lower relative frequencies  
276 (0.01, 0.001, 0.0001), more important transgressive interactions (such as lower ethanol  
277 production) could be achieved in mixed cultures.

278 Meanwhile NS fermentations present similarities, it was possible to group the NS strains  
279 performance according to their genus (see PCA in figures 5). While *H. uvarum* and *H. opuntiae*  
280 both presented similar phenotypes, *M. pulcherrima* and *M. fructicola* presented a more distinct  
281 phenotype. Regarding *Metschnikowia* species, **Mp** and **Mf** single strain cultures were  
282 characterized by a short growth phase reaching a small carrying capacity and followed by a  
283 long stationary phase, maintaining viability at a high level.

284 Nevertheless, despite *Metschnikowia* high viability, the resources measured (sugars and  
285 nitrogen) were not entirely consumed. The reason why the cells stopped growing remains  
286 unclear. A possible explanation could be linked to resources that have not been considered in  
287 the present study. For instance, the third most important resource to be considered during  
288 fermentation, even using synthetic medium, is lipid content, available as phytosterols and fatty  
289 acids. In fact, for all yeast species, yeast lipid synthesis requires oxygen and is therefore  
290 impossible in anaerobic conditions. With the progress of fermentation and ensuing oxygen  
291 limitation yeast should import lipids to survive. If not, it stops to multiply. It is the lack of lipid  
292 uptake under anaerobiosis that we can hypothesized for some *Metschnikowia* species. In fact,  
293 we have shown that some of them were unable to import lipids from the medium, depending  
294 instead on their own (internal) lipid synthesis for their growth (see Fig S1).

295 Interestingly, even though *S. cerevisiae*, *M. pulcherrima* and *M. fructicola* mortality rates  
296 were low in single strain cultures, the corresponding mixed cultures (**ScvsMp** and **ScvsMf**)  
297 presented 30% mortality (after 200 hours of fermentation). Moreover, this mortality seemed to  
298 impact both species differently. In the mixed **ScvsMp** culture, only *S. cerevisiae* cells eventually

299 died, whereas in *ScvsMf* both species were negatively affected. The survival of *M. pulcherrima*  
300 cells compared to *S. cerevisiae* cells could be explained by the production of pulcherriminic  
301 acid by *M. pulcherrima* (21). Indeed, pulcherriminic acid is known to deplete iron from the  
302 medium, which has a lethal effect on *S. cerevisiae* cells (13,22,23). In *ScvsMf* cultures, the  
303 mortality observed in both species suggests a more complex mechanism of interaction  
304 (although it is not clear whether *M. fructicola* also produces pulcherriminic acid; Kurtzman and  
305 Droby, 2001). To explain these results, we could hypothesize the conjunction of two different  
306 mechanisms of interaction. It could be that *M. fructicola* synthesized a metabolite  
307 (pulcherriminic acid?) impacting the viability of *S. cerevisiae* cells (through iron depletion?),  
308 with *M. fructicola* cells dying thereafter for another reason such as sensitivity to ethanol.  
309 Indeed, the production of ethanol was almost four times higher in mixed cultures than in single  
310 strain *Metschnikowia* fermentations. Under such hypothesis, the reason why no loss of viability  
311 was observed for *M. pulcherrima* in mixed culture with *S. cerevisiae* could probably be related  
312 to a better tolerance of *M. pulcherrima* to ethanol stress compared to *M. fructicola*.

313

314 For all *Metschnikowia* and *Hanseniaspora* mixed cultures, we only discussed  
315 transgressive interactions when mixed cultures over-produced (or under-produced) a given  
316 metabolite. Indeed, it was very difficult to identify interactions when the productions of mixed  
317 fermentations were within the range of isolated cultures productions. As the relative frequency  
318 of both strains in mixed cultures evolved during fermentation, it was difficult to link the final  
319 mix to the contributions of each species. It was even more difficult to assess whether these  
320 contributions combined additively or with interaction. New statistical developments or dual  
321 transcriptomics will be needed to answer this question (24–26).

322



323 To discuss more generally the mechanisms of interactions of *Metschnikowia* and  
324 *Hanseniaspora* cultures mixed with *S. cerevisiae*, we could not evidence any major antagonistic  
325 phenomena. For almost all assays, mixed cultures performance stood always between that of  
326 the corresponding isolated cultures (Fig 1, 2 & 3), except for the total production of glycerol.  
327 Moreover, despite the differences in yield and interactions between species, the rapid  
328 dominance of *S. cerevisiae* (increasing from 10% to at least 50% during the fermentation)  
329 resulted in mixed cultures that were overall not different from *S. cerevisiae* single strain  
330 cultures. This result is in agreement with the good adaptation of *S. cerevisiae* to winemaking  
331 conditions (4–6,27) but could be different with a different set of strains. This result is important  
332 in the context of ecological engineering. In fact, our results confirmed that *S. cerevisiae* has a  
333 much better fitness than the NS strains studied in this paper. Therefore, if we want mixed culture  
334 behavior to deviate from that of *S. cerevisiae* single strain culture, it must be ensured that NS  
335 cells dominate the culture as soon as possible. To achieve this, two conceivable options are  
336 currently tested: either to reduce the proportion of *S. cerevisiae* at  $t_0$  or to successively inoculate  
337 (16) first the NS species , and only then the *S. cerevisiae* strain. These two options could be  
338 equivalent depending on the type of interaction(s) that occurs. If strain behaviors in single  
339 strain or mixed cultures are identical, then all interactions are mediated by the medium through  
340 the competition for resources and the production of constitutive toxins such as ethanol  
341 (producing a toxin only in mixed fermentation would be a behavior change) and could be  
342 qualified as “indirect”.

343 Mathematical models could be designed from data on isolated cultures to predict the  
344 impact of indirect interactions in mixed cultures. This would allow simulating numerous mixes  
345 of species with various initial conditions and identify optimal strategies depending on one or  
346 several given criteria. Using these approaches could limit the number of necessary tests,  
347 potentially saving a lot of time and money and opening the way to a more methodical ecological

348 engineering. The development of such mathematical models will only be possible thanks to a  
349 deep tracking of population dynamics to understand underlying mechanisms of growth and  
350 mortality. Obviously, it is also critical to validate this approach by i) first extending the number  
351 of species co-cultured with *S. cerevisiae*, ii) investigating intra-specific variability and strain-  
352 strain interactions between species, iii) investigating the impact of the environment of culture  
353 (temperature, grape variety, etc.).

354

355

356

## 357 **4. Mat & Met**

### 358 **4.1. Strains**

359 In this work, we used one strain of 5 different species (one strain per species):  
360 *Saccharomyces cerevisiae* (**Sc**), *Metschnikowia pulcherrima* (**Mp**), *M. fructicola* (**Mf**),  
361 *Hanseniaspora uvarum* (**Hu**) and *H. opuntiae* (**Ho**). The *S. cerevisiae* strain is a haploid strain  
362 from EC1118 labelled with GFP (59A-GFP, Marsit and Dequin, 2015). The *Hanseniaspora*  
363 *uvarum* (CLIB 3221) *H. opuntiae* (CLIB 3093) and *Metschnikowia pulcherrima* (CLIB 3235)  
364 strains originated from the yeast CIRM ([https://www6.inra.fr/cirm\\_eng/Yeasts/Strain-](https://www6.inra.fr/cirm_eng/Yeasts/Strain-catalogue)  
365 *catalogue*) and were isolated from grape musts. The *Metschnikowia fructicola* strain was from  
366 the Lallemand collection.

367

368 For each strain, 3 replicates of single strain cultures were performed (except for *S.*  
369 *cerevisiae* that had a total of 8 replicates in different blocks). In addition, for each NS strain, 3  
370 replicates of a mixed culture with the **Sc** strain were performed. In all mixed fermentations, the  
371 starting proportion of *S. cerevisiae* cells was set at 10%. In this text, fermentations were referred

372 to by the species that performed them, i.e. single strain cultures were referred to as: *Sc*, *Mp*,  
373 *Mf*, *Hu* and *Ho* and mixed strain cultures as *ScvsMp*, *ScvsMf*, *ScvsHu* and *ScvsHo*.

374

#### 375 **4.2. Medium**

376 Initial cultures (12 h, in 50 ml YPD medium, 28 °C) were used to inoculate fermentation  
377 media at a total density of  $10^6$  cells/mL; therefore, for mixed culture the *S. cerevisiae* cells  
378 density was  $0.1 \times 10^6$  /mL and the NS cells density was  $0.9 \times 10^6$  /mL. Fermentations were carried  
379 out in a synthetic medium (SM) mimicking standard grape juice (28). The SM used in this study  
380 contained 200 g/L of sugar (100 g glucose and 100 g fructose per liter) and 200 mg/L of  
381 assimilable nitrogen (as a mix of ammonium chloride and amino acids). The concentrations of  
382 weak acids, salts and vitamins were identical to those described by Seguinot et al. (29). The pH  
383 of the medium was adjusted to 3.3 with 10M NaOH. The SM medium was first saturated with  
384 bubbling air for 40 minutes, then it was supplemented with 5 mg/L phytosterols (85451, Sigma  
385 Aldrich) solubilized in Tween 80 to fulfill the lipid requirements (sterols and fatty acids) of  
386 yeast cells during anaerobic growth.

387

#### 388 **4.3. Measurements**

389 Fermentation took place in 1.1-liter fermentors equipped with fermentation locks to  
390 maintain anaerobiosis, at 20 °C, with continuous magnetic stirring (500 rpm) during  
391 approximately 300h. CO<sub>2</sub> release was followed by automatic measurements of fermentor  
392 weight loss every 20 min. The amount of CO<sub>2</sub> released allowed us to monitor the progress of  
393 the fermentation and evaluate the maximum of released CO<sub>2</sub> (*CO2max*) as well as the  
394 maximum rate of CO<sub>2</sub> released (*Vmax*). Samples were harvested after 6h, 12h and 24h, then  
395 every 12h during the first week and every 24h during the second week of fermentation. For  
396 each sample, the population density cells were determined using a BD Accuri™ C6 Plus flow

397 cytometer as described in (30). Viability was determined using propidium iodide staining and  
398 BD Accuri™ C6 Plus flow cytometer adapted from (31). Proportions of *S. cerevisiae* in mixed-  
399 culture was established thanks to the green fluorescence produced by the *S. cerevisiae* 59A-  
400 GFP, the forward and side scatters from the BD Accuri™ C6 Plus flow cytometer and machine  
401 learning using the caret package in R (32). From these population densities (without taking into  
402 account viability), we fitted a growth population model (with the growthcurver package in R,  
403 (33), and determined the carrying capacity ( $K$ ) and maximum growth rate ( $\mu$ ) for each  
404 fermentation.

405 The final concentrations of carbon metabolites in the medium (acetate, succinate,  
406 glycerol, alpha-ketoglutarate, pyruvate, ethanol, glucose and fructose) were determined with  
407 high-pressure liquid chromatography (34). From these metabolite concentrations, we first  
408 calculated the consumed sugar concentration as the difference between the final and the initial  
409 concentration of either glucose or fructose. Then we calculated the yield of metabolite  
410 production by dividing the final concentration by the corresponding consumed sugar  
411 concentration. Finally, we compared these yields to the yield of *S. cerevisiae* single strain  
412 cultures considered as reference.

413 Finally, the ammonium concentration after 100h of fermentation was determined  
414 enzymatically with R-Biopharm (Darmstadt, Germany) and the free amino acid content of the  
415 must was estimated through cation exchange chromatography with post-column ninhydrin  
416 derivatization (35).

417

#### 418 **4.4. Statistical Analysis**

419 The experimental work was performed in 5 different blocks. Each block was composed  
420 of three replicates of NS fermentations (for example *Hu*), three replicates of the corresponding  
421 mixed fermentations with *S. cerevisiae* (for example *ScvsHu*) and one or two fermentations of

422 single strain *S. cerevisiae* cells (**Sc**). The block effect was evaluated on the parameters of the  
423 **Sc** fermentation. For most studied parameters, the block effect was not significant. For those  
424 parameters where a block effect was observed (**mu** and **K**), a statistical correction for block  
425 effect did not modify our results. Therefore, for simplification purposes, we compared all  
426 fermentations without any correction for the block effect parameter. For each measured  
427 parameter, an ANOVA was performed to evaluate the type of fermentation (**Sc**, **Mp**, **Mf**, **Hu**,  
428 **Ho**, **ScvsTd**, **ScvsMp**, **ScvsMf**, **ScvsHu** and **ScvsHo**) effect and then a Tukey t-test was  
429 performed to determine statistical groups and two-by-two statistical differences. All statistical  
430 analyses were performed using R (36) and Rstudio (37). All data, analysis and figures scripts  
431 can be found in this github address: <https://github.com/tnidelet/Git-Harle-et-al-2019>.

432

## 433 **Acknowledgments.**

434 We thank the CIRM, the Lallemand company, Jean-Luc Legras, Virginie Galeote and Jean-  
435 Nicolas Jasmin for providing the strains used in this study. We thank also Christian Picou, Marc  
436 Perez, Faiza Macna for technical assistance and Delphine Sicard for advices.

## 437 **References**

- 438 1. Marsit S, Dequin S. Diversity and adaptive evolution of *Saccharomyces* wine yeast: a  
439 review. *FEMS Yeast Research*. 1 nov 2015;15(7):fov067.
- 440 2. Sablayrolles J. Fermented beverages: the example of winemaking. *Advances in*  
441 *Fermentation Technology* New Delhi: Asiatech Publishers. 2008;322–47.
- 442 3. García-Ríos E, Gutiérrez A, Salvadó Z, Arroyo-López FN, Guillamon JM. The Fitness  
443 Advantage of Commercial Wine Yeasts in Relation to the Nitrogen Concentration,  
444 Temperature, and Ethanol Content under Microvinification Conditions. *Appl Environ*  
445 *Microbiol*. 15 janv 2014;80(2):704-13.
- 446 4. Jolly NP, Varela C, Pretorius IS. Not your ordinary yeast: non-*Saccharomyces* yeasts in  
447 wine production uncovered. *Fems Yeast Res*. 2014;14(2):215-37.

- 448 5. Pinto C, Pinho D, Cardoso R, Custódio V, Fernandes J, Sousa S, et al. Wine  
449 fermentation microbiome: a landscape from different Portuguese wine appellations.  
450 2015;6:905.
- 451 6. Varela C. The impact of non-Saccharomyces yeasts in the production of alcoholic  
452 beverages. *Appl Microbiol Biot.* 2016;100(23):9861-74.
- 453 7. Ivey M, Massel M, Phister TG. Microbial Interactions in Food Fermentations. *Annual*  
454 *Review of Food Science and Technology.* 2013;4(1):141-62.
- 455 8. Sadineni V, Kondapalli N, Obulam V. Effect of co-fermentation with *Saccharomyces*  
456 *cerevisiae* and *Torulaspora delbrueckii* or *Metschnikowia pulcherrima* on the aroma and  
457 sensory properties of mango wine. *Ann Microbiol.* 2012;62(4):1353-60.
- 458 9. P H-O, Cersosimo M, Loscos N, Cacho J, E G-M, Ferreira V. The development of  
459 varietal aroma from non-floral grapes by yeasts of different genera. *Food Chem.*  
460 2008;107(3):1064-77.
- 461 10. Contreras A, Hidalgo C, Henschke PA, Chambers PJ, Curtin C, Varela C. Evaluation of  
462 Non-Saccharomyces Yeasts for the Reduction of Alcohol Content in Wine. *Appl*  
463 *Environ Microbiol.* 1 mars 2014;80(5):1670-8.
- 464 11. Belda I, Navascués E, Marquina D, Santos A, Calderon F, Benito S. Dynamic analysis  
465 of physiological properties of *Torulaspora delbrueckii* in wine fermentations and its  
466 incidence on wine quality. *Appl Microbiol Biot.* 2015;99(4):1911-22.
- 467 12. Elena G-R, Pascual O, Kontoudakis N, Esteruelas M, Braulio E-Z, Mas A, et al.  
468 Oenological consequences of sequential inoculation with non-Saccharomyces yeasts  
469 (*Torulaspora delbrueckii* or *Metschnikowia pulcherrima*) and *Saccharomyces cerevisiae*  
470 in base wine for sparkling wine production. *Eur Food Res Technol.*  
471 2015;240(5):999-1012.
- 472 13. Oro L, Ciani M, Comitini F. Antimicrobial activity of *Metschnikowia pulcherrima* on  
473 wine yeasts. *J Appl Microbiol.* 2014;116(5):1209-17.
- 474 14. Kurtzman CP, Droby S. *Metschnikowia fructicola*, a New Ascosporic Yeast with  
475 Potential for Biocontrol of Postharvest Fruit Rots. *Systematic and Applied*  
476 *Microbiology.* janv 2001;24(3):395-9.
- 477 15. Hu K, Qin Y, Tao Y-S, Zhu X-L, Peng C-T, Ullah N. Potential of Glycosidase from  
478 Non-Saccharomyces Isolates for Enhancement of Wine Aroma. *Journal of Food Science.*  
479 81(4):M935-43.
- 480 16. Tristezza M, Tufariello M, Capozzi V, Spano G, Mita G, Grieco F. The Oenological  
481 Potential of *Hanseniaspora uvarum* in Simultaneous and Sequential Co-fermentation  
482 with *Saccharomyces cerevisiae* for Industrial Wine Production. *Front Microbiol*  
483 [Internet]. 2016 [cité 2 juill 2018];7. Disponible sur:  
484 <https://www.frontiersin.org/articles/10.3389/fmicb.2016.00670/full>
- 485 17. Song H-S, Cannon WR, Beliaev AS, Konopka A. Mathematical Modeling of Microbial  
486 Community Dynamics: A Methodological Review. *Processes.* 17 oct 2014;2(4):711-52.

- 487 18. Wang C, Mas A, Esteve-Zarzoso B. The Interaction between *Saccharomyces cerevisiae*  
488 and Non-*Saccharomyces* Yeast during Alcoholic Fermentation Is Species and Strain  
489 Specific. *Front Microbiol* [Internet]. 2016 [cité 8 oct 2019];7. Disponible sur:  
490 <https://www.frontiersin.org/articles/10.3389/fmicb.2016.00502/full>
- 491 19. Ciani M, Ferraro L. Enhanced Glycerol Content in Wines Made with Immobilized  
492 *Candida stellata* Cells. *Appl Environ Microbiol*. 1 janv 1996;62(1):128-32.
- 493 20. Moreira N, Mendes F, de Pinho P, journal of ... H-T. Heavy sulphur compounds, higher  
494 alcohols and esters production profile of *Hanseniaspora uvarum* and *Hanseniaspora*  
495 *guilliermondii* grown as pure and .... *International journal of* .... 2008;
- 496 21. MacDonald. Biosynthesis of pulcherriminic acid. *Biochem J*. 1965;96(2):533-8.
- 497 22. Sipiczki M. *Metschnikowia* Strains Isolated from Botrytized Grapes Antagonize Fungal  
498 and Bacterial Growth by Iron Depletion. *Appl Environ Microb*. 2006;72(10):6716-24.
- 499 23. Türkel S, C E-B. Isolation and characterization of new *Metschnikowia pulcherrima*  
500 strains as producers of the antimicrobial pigment pulcherrimin. *Zeitschrift für*  
501 *Naturforschung C*. 2009;
- 502 24. Barot S, Allard V, Cantarel A, Enjalbert J, Gauffreteau A, Goldringer I, et al. Designing  
503 mixtures of varieties for multifunctional agriculture with the help of ecology. A review.  
504 *Agron Sustain Dev*. 2017;37(2):13.
- 505 25. Finckh MR (International RRI, Mundt CC. Stripe rust, yield, and plant competition in  
506 wheat cultivar mixtures. *Phytopathology (USA)* [Internet]. 1992 [cité 17 janv 2019];  
507 Disponible sur: <http://agris.fao.org/agris-search/search.do?recordID=US9307396>
- 508 26. Wolf T, Kämmer P, Brunke S, Linde J. Two's company: studying interspecies  
509 relationships with dual RNA-seq. *Current Opinion in Microbiology*. 1 avr 2018;42:7-12.
- 510 27. García M, Braulio E-Z, Arroyo T. Non-*Saccharomyces* Yeasts: Biotechnological Role  
511 for Wine Production. 2016.
- 512 28. Bely M, Sablayrolles JM, Barre P. Description of Alcoholic Fermentation Kinetics: Its  
513 Variability and Significance. *Am J Enol Vitic*. 1 janv 1990;41(4):319-24.
- 514 29. Seguinot P, SANCHEZ I, Bloem A, Ortiz-Julien A, Camarasa C. Impact of nitrogen  
515 sources on the fermentative kinetic of non - *Saccharomyces* yeasts [Internet]. 2017 [cité  
516 2 juill 2018]. np. Disponible sur: <https://hal.archives-ouvertes.fr/hal-01604146>
- 517 30. Delobel P, Pradal M, Blondin B, Tesniere C. A 'fragile cell' sub-population revealed  
518 during cytometric assessment of *Saccharomyces cerevisiae* viability in lipid-limited  
519 alcoholic fermentation. *Letters in Applied Microbiology*. 55(5):338-44.
- 520 31. Riccardi C, Nicoletti I. Analysis of apoptosis by propidium iodide staining and flow  
521 cytometry. *Nat Protoc*. août 2006;1(3):1458-61.
- 522 32. Kuhn M. Building Predictive Models in R Using the caret Package. *Journal of Statistical*  
523 *Software*. 10 nov 2008;28(1):1-26.

- 524 33. Sprouffske K, Wagner A. Growthcurver: an R package for obtaining interpretable  
525 metrics from microbial growth curves. BMC Bioinformatics. 19 avr 2016;17(1):172.
- 526 34. Camarasa C, Sanchez I, Brial P, Bigey F, Dequin S. Phenotypic landscape of  
527 *Saccharomyces cerevisiae* during wine fermentation: evidence for origin-dependent  
528 metabolic traits. PLoS ONE. 2011;6(9):e25147.
- 529 35. Crépin L, Nidelet T, Sanchez I, Dequin S, Camarasa C. Sequential Use of Nitrogen  
530 Compounds by *Saccharomyces cerevisiae* during Wine Fermentation: a Model Based on  
531 Kinetic and Regulation Characteristics of Nitrogen Permeases. 2012;78(22):8102-11.
- 532 36. R Core Team (2016). R: A language and environment for statistical computing. R  
533 Foundation for Statistical Computing, Vienna, Austria. URL [https://www.R-](https://www.R-project.org/)  
534 [project.org/](https://www.R-project.org/).
- 535 37. RStudio (2012). RStudio: Integrated development environment for R (Version 0.96.122)  
536 [Computer software]. Boston, MA. Retrieved May 20, 2012. Available from  
537 <http://www.rstudio.org/>.

538



539

## 540 Supporting information

541 S1 FIG

542 **Glucose and Fructose consumption kinetics in function of different strains.** Each point  
543 represents a sample (average  $\pm$  standard deviation).

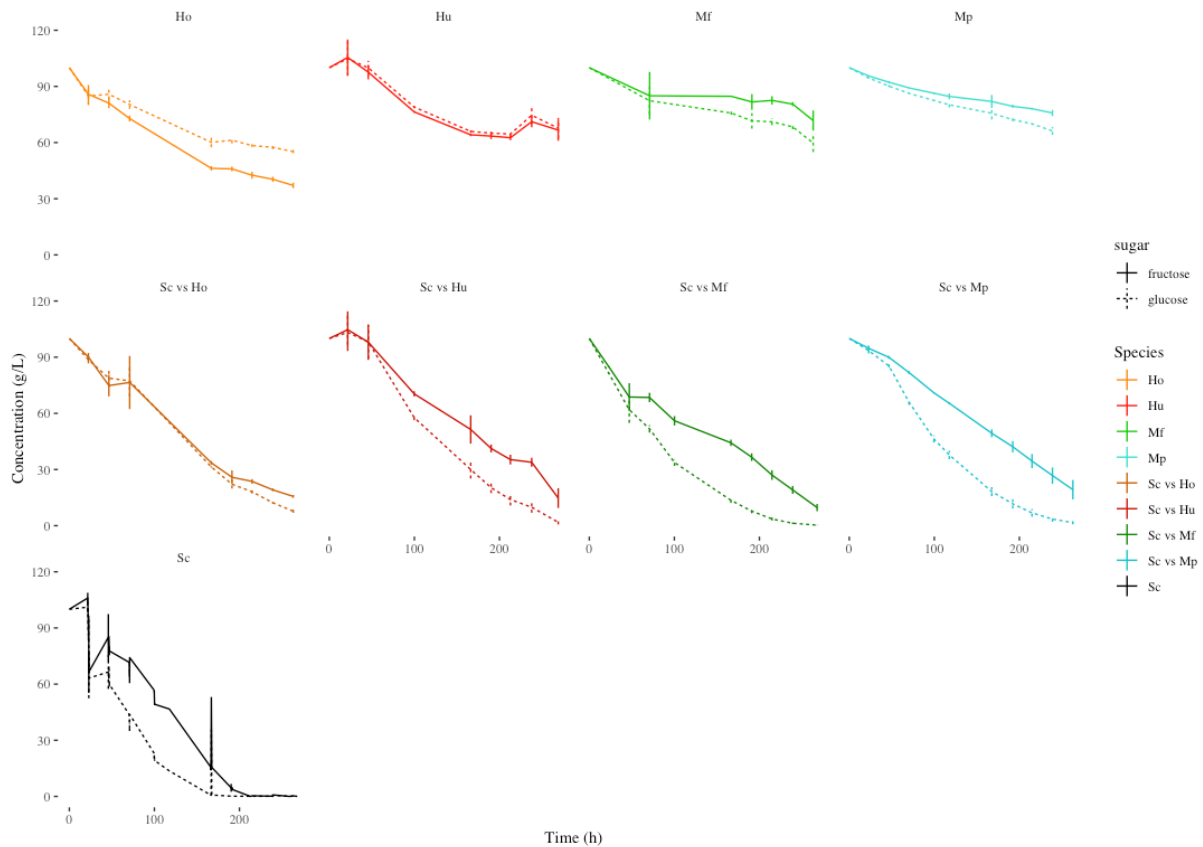

544

545

546 S2 FIG

547 **Total production of carbon metabolite in function of the strains driving the**  
548 **fermentation.** Average production are given with standard deviations for acetate, alpha-  
549 ketoglutarate, ethanol, glycerol, pyruvate and succinate.

550

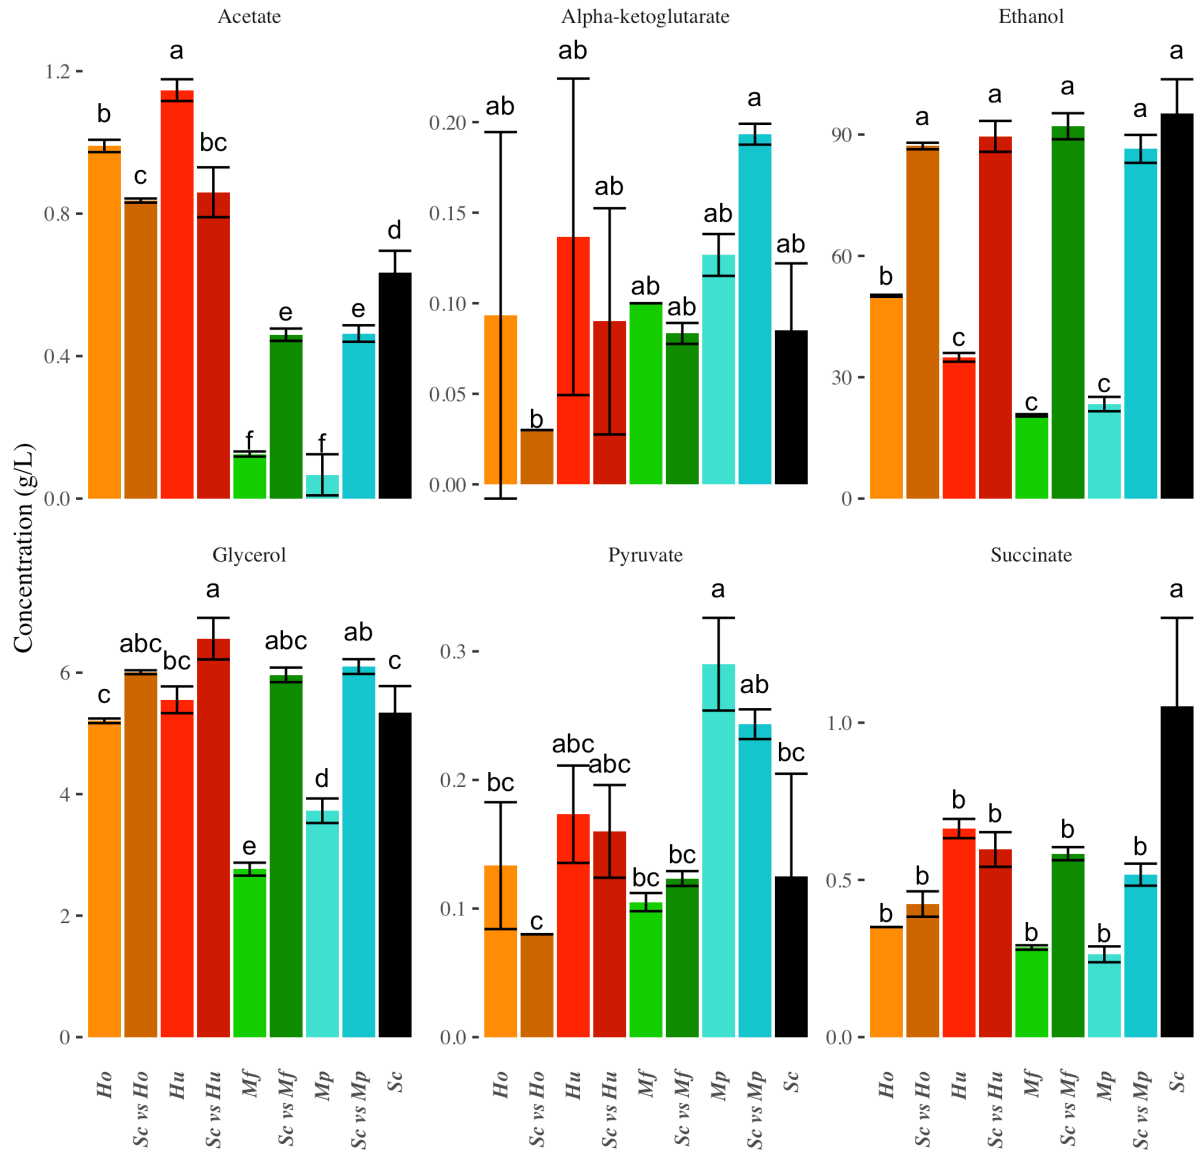

551  
552  
553

### S3 FIG

554  
555  
556  
557

**Principal component analysis of carbon metabolites and growth parameter of isolated cultures.** The mixed cultures are a second time projected on the plan determiner by only isolated cultures. In the top right is represented the circle of variables.

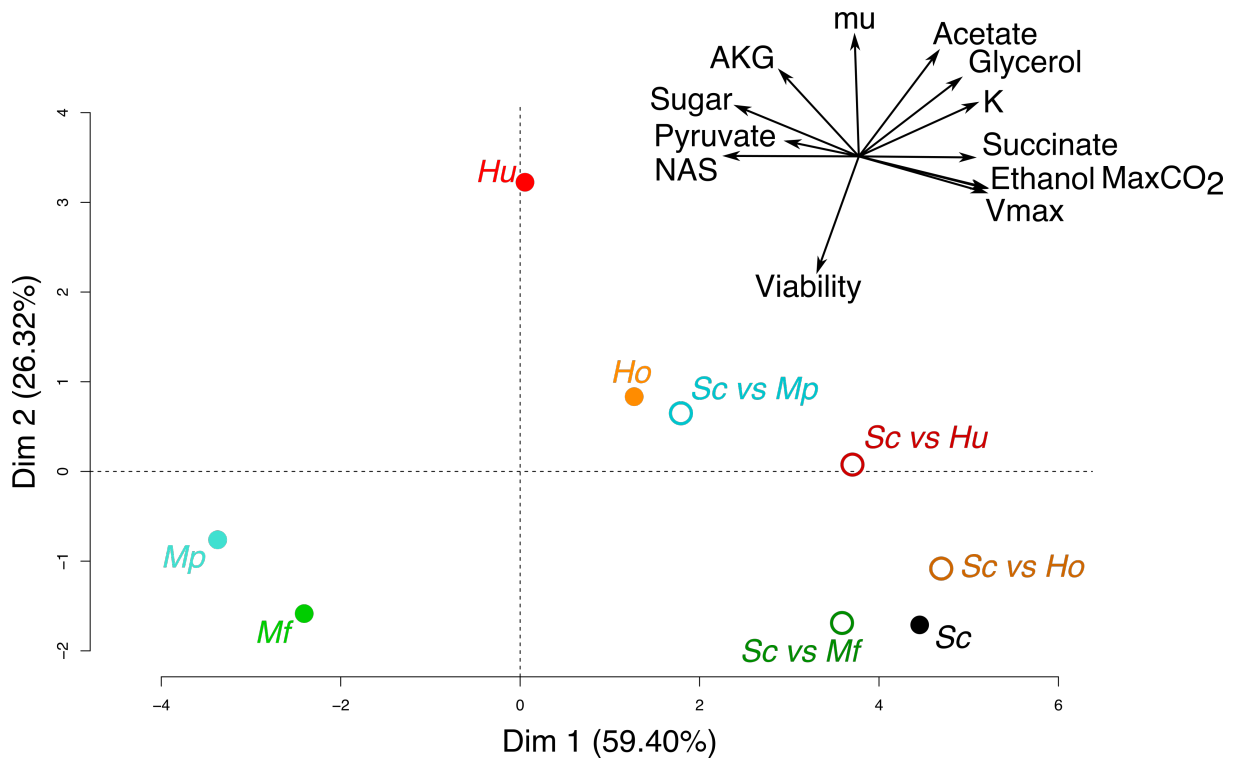

558  
559  
560

**S4 FIG**

561 **Serial tenfold dilutions of two *Metschnikovia pulcherrima* strains (A and B) spotted**  
 562 **onto various synthetic standard agar media (SM425, 425 mg/l assimilable nitrogen) with**  
 563 **Tween 80, (Tw, 0.06%), supplemented or not with phytosterol (Phyto, 20 mg/L), in the**  
 564 **presence or not of fluconazole (FLC, 256 µg/mL). Plates were incubated at 28°C for five**  
 565 **days in air or in anaerobiosis.**  
 566

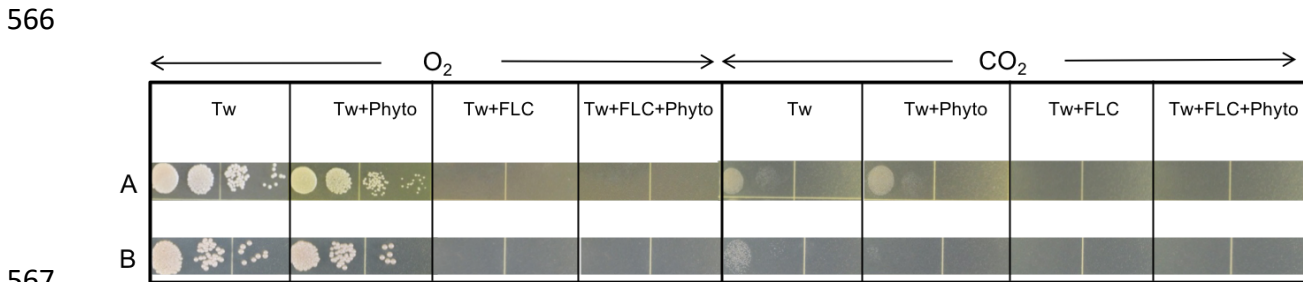

567

## 568 S1 TABLE

## 569 Growth parameter values for each type of fermentation.

| 570 | $\mu$         | K                             | prop                       | Vmax                   | MaxCO <sub>2</sub>     | Sugar                  | NAS                     | Ethanol                    | Glycerol              | Succinate                    | Acetate                      | Pyruvate                | Alpha                        |                              |
|-----|---------------|-------------------------------|----------------------------|------------------------|------------------------|------------------------|-------------------------|----------------------------|-----------------------|------------------------------|------------------------------|-------------------------|------------------------------|------------------------------|
| 571 | <i>Sc</i>     | 0.15±0.02 <sup>bc</sup>       | 1.6±0.2 <sup>bcd</sup>     | NA                     | 0.99±0.03 <sup>a</sup> | 88.2±2.2 <sup>a</sup>  | 0.2±0.2 <sup>d</sup>    | 10.4±8.6 <sup>c</sup>      | 95.2±8.4 <sup>a</sup> | 5.3±0.4 <sup>c</sup>         | 1.05±0.28 <sup>a</sup>       | 0.63±0.06 <sup>d</sup>  | 0.12±0.08 <sup>bc</sup>      | 0.08±0.04 <sup>ab</sup>      |
| 572 | <i>Ho</i>     | 0.19±0.03 <sup>bc</sup>       | 1.6±0.1 <sup>bc</sup>      | NA                     | 0.42±0.02 <sup>d</sup> | 46.4±0.6 <sup>d</sup>  | 92.3±1.4 <sup>b</sup>   | 122.2±3.5 <sup>b</sup>     | 50.1±0.2 <sup>b</sup> | 5.2±0.0 <sup>c</sup>         | 0.35±0.00 <sup>b</sup>       | 0.99±0.02 <sup>b</sup>  | 0.13±0.05 <sup>bc</sup>      | 0.09±0.1 <sup>ab</sup>       |
| 573 | <i>ScvsHo</i> | <b>0.11±0.00<sup>bc</sup></b> | <b>2.3±0.1<sup>a</sup></b> | 0.83±0.02 <sup>b</sup> | 0.57±0.01 <sup>c</sup> | 82.7±0.6 <sup>bc</sup> | 23.3±1.3 <sup>c</sup>   | <b>6.4±2.4<sup>c</sup></b> | 87.2±0.8 <sup>a</sup> | <b>6.0±0.0<sup>abc</sup></b> | 0.42±0.04 <sup>b</sup>       | 0.84±0.01 <sup>c</sup>  | <b>0.08±0.00<sup>c</sup></b> | <b>0.03±0.0<sup>b</sup></b>  |
| 574 | <i>Hu</i>     | 0.62±0.18 <sup>a</sup>        | 1.4±0.1 <sup>cde</sup>     | NA                     | 0.34±0.04 <sup>d</sup> | 30.7±0.5 <sup>e</sup>  | 134.3±11.2 <sup>a</sup> | 173.3±24.8 <sup>b</sup>    | 34.9±1.1 <sup>c</sup> | 5.5±0.2 <sup>bc</sup>        | 0.66±0.03 <sup>b</sup>       | 1.15±0.03 <sup>a</sup>  | 0.17±0.04 <sup>abc</sup>     | 0.14±0.09 <sup>ab</sup>      |
| 575 | <i>ScvsHu</i> | 0.24±0.01 <sup>b</sup>        | <b>1.7±0.1<sup>b</sup></b> | 0.76±0.01 <sup>c</sup> | 0.53±0.04 <sup>c</sup> | 82.1±1.5 <sup>c</sup>  | 16.5±6.5 <sup>c</sup>   | <b>4.6±4.2<sup>c</sup></b> | 89.5±3.8 <sup>a</sup> | <b>6.6±0.3<sup>a</sup></b>   | <b>0.60±0.06<sup>b</sup></b> | 0.86±0.07 <sup>bc</sup> | 0.16±0.04 <sup>abc</sup>     | 0.09±0.06 <sup>ab</sup>      |
| 576 | <i>Mf</i>     | 0.17±0.02 <sup>bc</sup>       | 0.8±0.05 <sup>f</sup>      | NA                     | 0.17±0.04 <sup>e</sup> | 20.6±1.2 <sup>f</sup>  | 135.8±9.7 <sup>a</sup>  | 256.6±2.9 <sup>a</sup>     | 20.6±0.3 <sup>c</sup> | 2.8±0.1 <sup>e</sup>         | 0.29±0.01 <sup>b</sup>       | 0.13±0.01 <sup>f</sup>  | 0.10±0.01 <sup>bc</sup>      | 0.10±0.00 <sup>ab</sup>      |
| 577 | <i>ScvsMf</i> | <b>0.09±0.01<sup>bc</sup></b> | 1.3±0.03 <sup>de</sup>     | 0.96±0.02 <sup>a</sup> | 0.76±0.03 <sup>b</sup> | 86.8±0.7 <sup>ab</sup> | 9.9±2.1 <sup>cd</sup>   | <b>1.8±0.1<sup>c</sup></b> | 92.1±3.2 <sup>a</sup> | <b>6.0±0.1<sup>abc</sup></b> | 0.58±0.02 <sup>b</sup>       | 0.46±0.02 <sup>e</sup>  | 0.12±0.01 <sup>bc</sup>      | 0.08±0.01 <sup>ab</sup>      |
| 578 | <i>Mp</i>     | 0.18±0.03 <sup>bc</sup>       | 0.6±0.01 <sup>f</sup>      | NA                     | 0.16±0.02 <sup>e</sup> | 21.8±0.4 <sup>f</sup>  | 142±3.7 <sup>a</sup>    | 305.5±5.9 <sup>a</sup>     | 23.4±1.8 <sup>c</sup> | 3.7±0.2 <sup>d</sup>         | 0.26±0.03 <sup>b</sup>       | 0.07±0.06 <sup>f</sup>  | 0.29±0.04 <sup>a</sup>       | 0.13±0.01 <sup>ab</sup>      |
| 579 | <i>ScvsMp</i> | <b>0.09±0.00<sup>c</sup></b>  | 1.3±0.01 <sup>e</sup>      | 0.50±0.02 <sup>d</sup> | 0.68±0.04 <sup>b</sup> | 83.3±2.2 <sup>bc</sup> | 20.8±6.0 <sup>c</sup>   | <b>2.1±0.2<sup>c</sup></b> | 86.5±3.4 <sup>a</sup> | <b>6.1±0.1<sup>ab</sup></b>  | 0.52±0.04 <sup>b</sup>       | 0.46±0.02 <sup>e</sup>  | 0.24±0.01 <sup>ab</sup>      | <b>0.19±0.01<sup>a</sup></b> |

580

581 Mu : h-1; K : 10<sup>8</sup> cells.mL-1, prop : no unity, Vmax : g.L-1.h-1, MaxCO<sub>2</sub> : g.L-1, Final Sugar : g.L-1, Final NAS : mg.L-1, Ethanol : g.L-1,  
 582 Glycerol : g.L-1, Succinate : g.L-1, Acetate : g.L-1, Pyruvate : g.L-1, Alpha : g.L-1

583 **Bold:** values of mixed culture that are not intermediate between the two values of the corresponding isolated cultures, a sign of transgressive  
 584 interactions.

585 Superscript: Statistical groups obtained from a Tukey test.
